# Supplementary material
Source: publisher figshare collection journal article supplement (https://tandf.figshare.com/ndownloader/files/13359293)
Supplement: Supplementary file 1 [file 13359293]

## Sheet: Sheet1
Sr.No.	Gene	Primer ID	Sequence (5'-3')	Amplicon size (bp)
1	BMP4	BMP4-E1F	CTCCCATCCCCAGAAAGG	470
		BMP4-E1R	ACAGCCTGTGACCAGCTTCT
		BMP4-E3F	CCATCTTGCCCCTCCATTTCTA	570
		BMP4-E3R	CTTCTTCCCCAGGGCTTTCACT
		BMP4-E4F1	TGCTTATTTTCCCCCAGTAGGT	704
		BMP4-E4R1	GGCGCCGGCAGTTCTTATTCTT
		BMP4-E4F2	GGGCCAGCATGTCAGGATTAGC	575
		BMP4-E4R2	TGTGGGTGAGTGGATGGGAACG
2	CRYBA4	CRYBA4-E2F	ACTCCTGGACTCCCTATGTG	319
		CRYBA4-E2R	ATTCAACCTCCCTGTATGTG
		CRYBA4-E3F	TCTTGCCTTCCTGGCTCCTG	430
		CRYBA4-E3R	TGCGCAACCTGCATAATCTT
		CRYBA4-E4F	CCCCTGAATGGTTGTGACT	396
		CRYBA4-E4R	AACCGAGGCTTGGAGAGGAA
		CRYBA4-E5F	AAGGGCAAATGGCAAGGTT	415
		CRYBA4-E5R	TGGGCATCAGAGCACAAAAG
3	FOXE3	FOXE3-E1F1	TGGGAGAGGAAATTAGAGGG	545
		FOXE3-E1R1	ACCTTGACGAAGCAGTCGTT
		FOXE3-E1F2	CGCAAGTGGCAGAACAGCAT	769
		FOXE3-E1R2	TAGCAGGAGTTTGAGTCCAG
4	GDF6	GDF6-E1F	GGCGGGGCCGGGGTTTGT	635
		GDF6-E1R	TAGCCTCCAGCGGGAACAGC
		GDF6-E2F1	CGGCCGACCTGCCCCCACTC	504
		GDF6-E2R1	CCGGCCGAAGCCCAGACTCC
		GDF6-E2F2	GCCGGCCGGCTGGGAAGTCT	557
		GDF6-E2R2	GCGAGCGCAGCGGGAAGTCG
		GDF6-E2F3	GCGCACGGCCTTCGCCAGTC	469
		GDF6-E2R3	CCAGCGCCAGCTTCCTCCTC
5	GJA3	GJA3-E2F1	CCATCCCAGTACCATCCAG	466
		GJA3-E2R1	TCTCTTCAGCTGCTCCTCCT
		GJA3-E2F2	AGAACGTCTGCTACGACAGG	513
		GJA3-E2R2	CCTGCTTGAGCTTCTTCCAG
		GJA3-E2F3	CGAGCTGAAGCCGCTCTA	518
		GJA3-E2R3	CTGCCGGGTAAGCCTTGA
		GJA3-E2F4	CGCGGACTTCAAACTGCTA	513
		GJA3-E2R4	TCTATCTGCTGGTGGGAAGTG
6	GJA8	GJA8-E2F1	TCTGCACAAAGGAAGCACTG	690
		GJA8-E2R1	CGGAACCCGTACAGGAAGTA
		GJA8-E2F2	GTGCTGCAGATCATCTTCGT	825
		GJA8-E2R2	TGCTTCCTCCTTCTTCTCTCC
		GJA8-E2F3	TGAGAAATCCCTCCACTCCA	752
		GJA8-E2R3	GTAGCCCTTATGCTGGATGC
7	MITF	MITF-E1F	TGGGAGCTGTAGTTTTCGTG	494
		MITF-E1R	ACTGGGTCCTTGTCCCAGAG
		MITF-E2F	TGATTATATTTGCGCAGACTCA	500
		MITF-E2R	AAGGGAGTTGGAGTTTTCAAAT
		MITF-E3F	GGCCTGGTCAGTTTCATGTT	449
		MITF-E3R	GGGGACAAAGGCTGGTAAAT
		MITF-E4F	CTGTGCCATCAGCTTTGTGT	391
		MITF-E4R	GCAGCAACTTAGGGGAAAAA
		MITF-E5F	GACCATTATTGCTTTGGGTAAAA	432
		MITF-E5R	CGTGGACTCCAGGGAATGTA
		MITF-E6F	CAAAGGGAACTGGTTGAGGA	464
		MITF-E6R	TGTTTTAACCACTGCAGAGACC
		MITF-E7F	TTTTGTGGAAGCCCAGTTTT	400
		MITF-E7R	CAGCTGTAGGAATCAACTCTCC
		MITF-E8F	CGTTGTCATGACCTGGAGAA	301
		MITF-E8R	CAAAGGGAGAGGGGAGACTT
		MITF-E9F	CACCTGTTCCCCCAAAACTA	372
		MITF-E9R	GTCAACTCCCCTATGGCTCA
8	OTX2	OTX2-E1F	AAGTTAGTGCTGGAACGTGG	474
		OTX2-E1R	TCAGTAAATGCCCTGGGACT
		OTX2-E2F	GAAAGAAGCAGCGTGTGTCC	541
		OTX2-E2R	GATTAAGTGGTGACGGGCAG
		OTX2-E3F1	GAGCCTCCCCAACTTTCTTAC	575
		OTX2-E3R1	GAAGCTGGTGATGCATAGGG
		OTX2-E3F2	TCAGATCCCTTGTCCACCTC	561
		OTX2-E3R2	TTTGTAGGCCCCTCTAAGGC
9	PAX6	PAX6-E1F	GAGCTGTGCCCAACTCTAGC	428
		PAX6-E1R	CCTTCCTATCCCTCCCTCAG
		PAX6-E2F	TTATCTCTCACTCTCCAGCC	276
		PAX6-E2R	AAGCGAGAAGAAAGAAGCGG
		PAX6-E3F	TCAGAGAGCCCATCGACGTAT	330
		PAX6-E3R	CTGTTTGTGGGTTTTGAGCC
		PAX6-E4F	TTGGGAGTTCAGGCCTACCT	153
		PAX6-E4R	GAAGTCCCAGAAAGACCAGA
		PAX6-E5F1	CCTCTTCACTCTGCTCTCTT	257
		PAX6-E5R1	ATGAAGAGAGGGCGTTGAGA
		PAX6-E5F2	TGAAAGTATCATCATATTTGTAG	237
		PAX6-E5R2	GGGAAGTGGACAGAAAACCA
		PAX6-E6F	GTGGTTTTCTGTCCACTTCC	299
		PAX6-E6R	AGGAGAGAGCATTGGGCTTA
		PAX6-E7F	CAGGAGACACTACCATTTGG	252
		PAX6-E7R	ATGCACATATGGAGAGCTGC
		PAX6-E8F	GGGAATGTTTTGGTGAGGCT	371
		PAX6-E8R	CAAAGGGCCCTGGCTAAATT
		PAX6-E9F	GTAGTTCTGGCACAATATGG	206
		PAX6-E9R	GTACTCTGTACAAGCACCTC
		PAX6-E10F	GTAGACACAGTGCTAACCTG	243
		PAX6-E10R	CCCGGAGCAAACAGGTTTAA
		PAX6-E11F	TTAAACCTGTTTGCTCCGGG	208
		PAX6-E11R	TTATGCAGGCCACCACCAGC
		PAX6-E12F	TAGCTCGAGGCCCAATCTTA	417
		PAX6-E12R	GTTAAACACGCCCTCCCATA
		PAX6-E13F	CATGTCTGTTTCTCAAAGGGA	957
		PAX6-E13R	GAACAATTAACTTTTGCTGGCC
10	PITX3	PITX3-E1F	CCGGCTGGGGGTGGCAGTACGCGG	252
		PITX3-E1R	GGTCCAGCAATAGCTCCTCGGCCC
		PITX3-E2F	CAGCTTTACGGCTGGGGTTGAG	296
		PITX3-E2R	GGATGAAGCTGTTATGTCCTGCAC
		PITX3-E3F	GGGAGCCAGCGAGTGGCTTAGGAG	374
		PITX3-E3R	GGGTGGAACCGCTGGCCTCCG
		PITX3-E4F	GTCTCTAGCCACCTCATCTC	808
		PITX3-E4R	CTGGGGCGGGAGCAAGCCAGTC
11	RAX	RAX-E1F	GGGCGCCCGAACGGCCTC	380
		RAX-E1R	GCCTCTCCTCTCCGTCTCC
		RAX-E2F	GGAGTGCATCTGACCCTCC	351
		RAX-E2R	TGGCTGCAATTTGGGCCTCG
		RAX-E3F	GAGCTGAACCGGCTCAGG	602
12	SIX3	SIX3-E1F1	TCATCGCCCCTCTCCTCCTCTT	398
		SIX3-E1R1	GCCGCTCGATGTCGCCCGTCTC
		SIX3-E1F2	CGGCGGCGGCGGCTCCAG	387
		SIX3-E1R2	CGCACGCGGTACTTGTCCAC
		SIX3-E1F3	GCGTGCGAGGCCATCAACAA	552
		SIX3-E1R3	CACGGCTTCCCTGGCTCTCA
		SIX3-E2F	GCTCGGGTTCTGCCTCTC	457
		SIX3-E2R	TCGGTTTGTTCTGGGGATGG
13	SIX6	SIX6-E1F1	TGTGTCCCGCTGCCCCAATC	514
		SIX6-E1R1	TTCTGTTCGCCGTCCCAAATG
		SIX6-E1F2	CCTTTCACGGTGGCAACTAC	514
		SIX6-E1R2	GACAGACCGCGCTCCCAACTC
		SIX6-E2F	CGCCTTGCCGAGTAATCCT	447
		SIX6-E2R	AGCCCGCGGGTCCCTGGTCAC
14	SOX2	SOX2-FW1	AGTCCCGGCCGGGCCGAG	602
		SOX2-RV1	GGTAGCCCAGCTGGTCCTG
		SOX2-FW2	CAAGACGCTCATGAAGAAGG	687
		SOX2-RV2	TACTCTCCTCTTTTGCACCC
15	VSX2	VSX2-E1F	TCCAGAGCATTAGACACCGG	599
		VSX2-E1R	TGGCAGGAACTTTTCCGCCT
		VSX2-E2F	GTTCAAAACCTCCGGATTCG	396
		VSX2-E2R	TCCGTTGTCGGCGAAAATAG
		VSX2-E3F	TCTTGTCTGAGACAGGCTCT	268
		VSX2-E3R	TCATGGGCATCTGGAACCCT
		VSX2-E4F	CACCATGGAGTAGGCGAGCT	434
		VSX2-E4R	ATTTCTCTCCTGCTAGGCTG
		VSX2-E5F	CAGTTCAAGATGGCTTTCCC	574
		VSX2-E5R	ATGTCTCAGCATGGTCCAGA
